# Supplementary material
Source: publisher site journal article supplement (https://www.dovepress.com/article/373748)
Supplement: Supplementary file 1 [file get_supplementary_file.php]

| <b>Supplementary table 1. Accuracy of validation controls</b> |                   |            |                 |
|---------------------------------------------------------------|-------------------|------------|-----------------|
| <b>Respiratory Viruses</b>                                    | <b>SARS-CoV-2</b> | <b>RSV</b> | <b>Flu A/ B</b> |
| RSV A2 cpts-248                                               |                   | Positive   |                 |
| SARS-CoV-2 (USA-WA1/2020)                                     | Positive          |            |                 |
| Influenza A virus (H3N2) (A/Wisconsin/67/2005)                |                   |            | Positive        |
| Influenza B virus (B/Virginia/ATCC4/2009)                     |                   |            | Positive        |
| Influenza A virus (H1N1) strain A/PR/8/34 (VR-95DQ)           |                   |            | Positive        |
| RSV A2 (VR-1540DQ)                                            |                   | Positive   |                 |
| SARs CoV2 (MN908947.3 Wuhan-Hu-1)                             | Positive          |            |                 |

| <b>Supplementary table 2. Precision and Repeatability of Taqman SARS-CoV2, Flu A/B, RSV multiplex assays</b> |                |                |                |            |             |            |
|--------------------------------------------------------------------------------------------------------------|----------------|----------------|----------------|------------|-------------|------------|
| <b>Intra-run</b>                                                                                             | <b>1st run</b> | <b>2nd run</b> | <b>3rd run</b> | <b>SDV</b> | <b>Mean</b> | <b>CV%</b> |
| SARS-CoV-2                                                                                                   | 21.9           | 21.8           | 21.8           | 0.06       | 21.8        | 0.26       |
| Influenza A/B                                                                                                | 20.3           | 20.1           | 20.2           | 0.10       | 20.2        | 0.50       |
| RSV                                                                                                          | 20.5           | 20.2           | 20.3           | 0.15       | 20.3        | 0.75       |
| <b>Inter-run</b>                                                                                             | <b>1st run</b> | <b>2nd run</b> | <b>3rd run</b> | <b>SDV</b> | <b>Mean</b> | <b>CV%</b> |
| SARS-CoV-2                                                                                                   | 20.5           | 20.2           | 20.3           | 0.15       | 20.3        | 0.75       |
| Influenza A/B                                                                                                | 20.5           | 20.2           | 20.3           | 0.15       | 20.3        | 0.75       |
| RSV                                                                                                          | 20.5           | 20.2           | 20.3           | 0.15       | 20.3        | 0.75       |

**Supplementary 3. Concordance of Co-infection detection**

| Expected results |            |               |          | Concordant |
|------------------|------------|---------------|----------|------------|
| Sample no.       | SARS-CoV-2 | Influenza A/B | RSV      | Yes/No     |
| PT 1             | Positive   | Positive      | Positive | Yes        |
| PT 2             | Positive   | Positive      | Negative | Yes        |
| PT 3             | Positive   | Positive      | Negative | Yes        |
| PT 4             | Positive   | Positive      | Negative | Yes        |
| PT 5             | Positive   | Negative      | Positive | Yes        |
| PT 6             | Positive   | Positive      | Positive | Yes        |
| PT 7             | Positive   | Positive      | Positive | Yes        |
| PT 8             | Positive   | Negative      | Positive | Yes        |
| PT 9             | Positive   | Positive      | Negative | Yes        |
| PT 10            | Positive   | Positive      | Negative | Yes        |
| PT 11            | Positive   | Positive      | Positive | Yes        |
| PT 12            | Positive   | Positive      | Negative | Yes        |
| PT 13            | Positive   | Positive      | Positive | Yes        |
| PT 14            | Positive   | Positive      | Positive | Yes        |
| PT 15            | Positive   | Negative      | Positive | Yes        |
| Spk NP 1         | Positive   | Positive      | Positive | Yes        |
| Spk NP 2         | Positive   | Positive      | Positive | Yes        |
| Spk NP 3         | Positive   | Positive      | Positive | Yes        |
| Spk NP 4         | Positive   | Positive      | Positive | Yes        |
| Spk NP 5         | Positive   | Positive      | Positive | Yes        |
| Spk NP 6         | Positive   | Positive      | Positive | Yes        |
| Spk NP 7         | Positive   | Positive      | Positive | Yes        |
| Spk NP 8         | Positive   | Positive      | Positive | Yes        |
| Spk NP 9         | Positive   | Positive      | Positive | Yes        |
| Spk NP 10        | Positive   | Positive      | Positive | Yes        |
| Spk NP 11        | Positive   | Positive      | Positive | Yes        |
| Spk NP 12        | Positive   | Positive      | Positive | Yes        |
| Spk NP 13        | Positive   | Positive      | Positive | Yes        |
| Spk NP 14        | Positive   | Positive      | Positive | Yes        |
| Spk NP 15        | Positive   | Positive      | Positive | Yes        |
| Spk NP 16        | Positive   | Positive      | Positive | Yes        |
| Spk NP 17        | Positive   | Positive      | Positive | Yes        |
| Spk NP 18        | Positive   | Positive      | Positive | Yes        |
| Spk NP 19        | Positive   | Positive      | Positive | Yes        |
| Spk NP 20        | Positive   | Positive      | Positive | Yes        |
| SPK SL 1         | Positive   | Positive      | Positive | Yes        |
| SPK SL 2         | Positive   | Positive      | Positive | Yes        |
| SPK SL 3         | Positive   | Positive      | Positive | Yes        |
| SPK SL 4         | Positive   | Positive      | Positive | Yes        |
| SPK SL 5         | Positive   | Positive      | Positive | Yes        |
| SPK SL 6         | Positive   | Positive      | Positive | Yes        |
| SPK SL 7         | Positive   | Positive      | Positive | Yes        |
| SPK SL 8         | Positive   | Positive      | Positive | Yes        |
| SPK SL 9         | Positive   | Positive      | Positive | Yes        |
| SPK SL 10        | Positive   | Positive      | Positive | Yes        |
| SPK SL 11        | Positive   | Positive      | Positive | Yes        |
| SPK SL 12        | Positive   | Positive      | Positive | Yes        |

|           |          |          |          |     |
|-----------|----------|----------|----------|-----|
| SPK SL 13 | Positive | Positive | Positive | Yes |
| SPK SL 14 | Positive | Positive | Positive | Yes |
| SPK SL 15 | Positive | Positive | Positive | Yes |
| SPK SL 16 | Positive | Positive | Positive | Yes |

PT: Patients sample

SPK NP: Spiked Nasopharyngeal sample

SPK SL: Spiked Saliva sample
